# Supplementary material for: Removal of bromophenol blue from polluted water using a novel azo-functionalized magnetic nano-adsorbent
Source: Royal Society of Chemistry journal article supplement (doi:10.1039/d3ra04222g), 2024-01-01
Supplement: d3ra04222g1.pdf [file d3ra04222g1.pdf]

## Supplementary Material

### Removal of Bromophenol Blue from Polluted Water Using a Novel Azo-Functionalized Magnetic Nano-Adsorbent

Hadeel Saad,<sup>a,b</sup> F. A. Nour El-Dien,<sup>a</sup> Nadia E. A. El-Gamel,<sup>a</sup> and Ahmed S. Abo  
Dena<sup>\*c,d</sup>

<sup>a</sup> Chemistry Department, Faculty of Science, Cairo University, Giza 12613, Egypt.

<sup>b</sup> General Organization for Export and Import Control, Ramses Street, Cairo, Egypt.

<sup>c</sup> Pharmaceutical Chemistry Department, National Organization for Drug Control and Research (NODCAR), Giza, Egypt.

<sup>d</sup> Faculty of Oral and Dental Medicine, Future University in Egypt (FUE), New Cairo, Egypt.

\* Corresponding author email: [ahmed\\_said5899@yahoo.com](mailto:ahmed_said5899@yahoo.com)

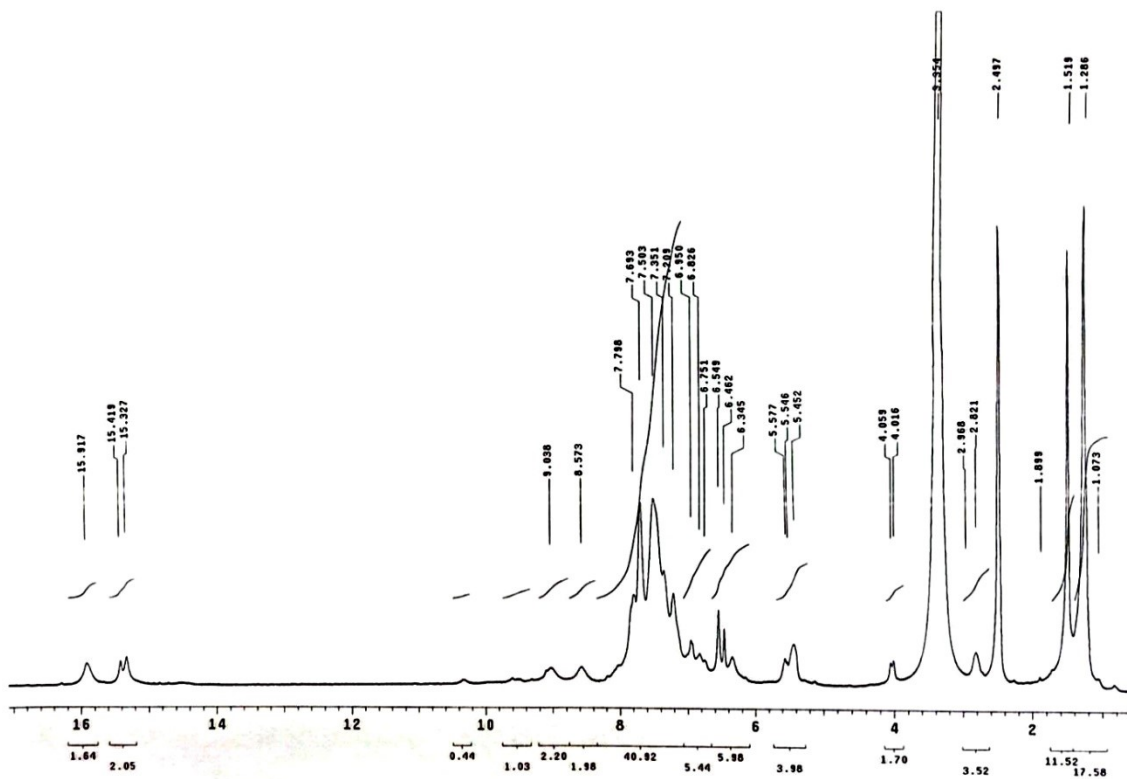

**Figure S1**  $^1\text{H}$ NMR spectrum of the synthesized AD.

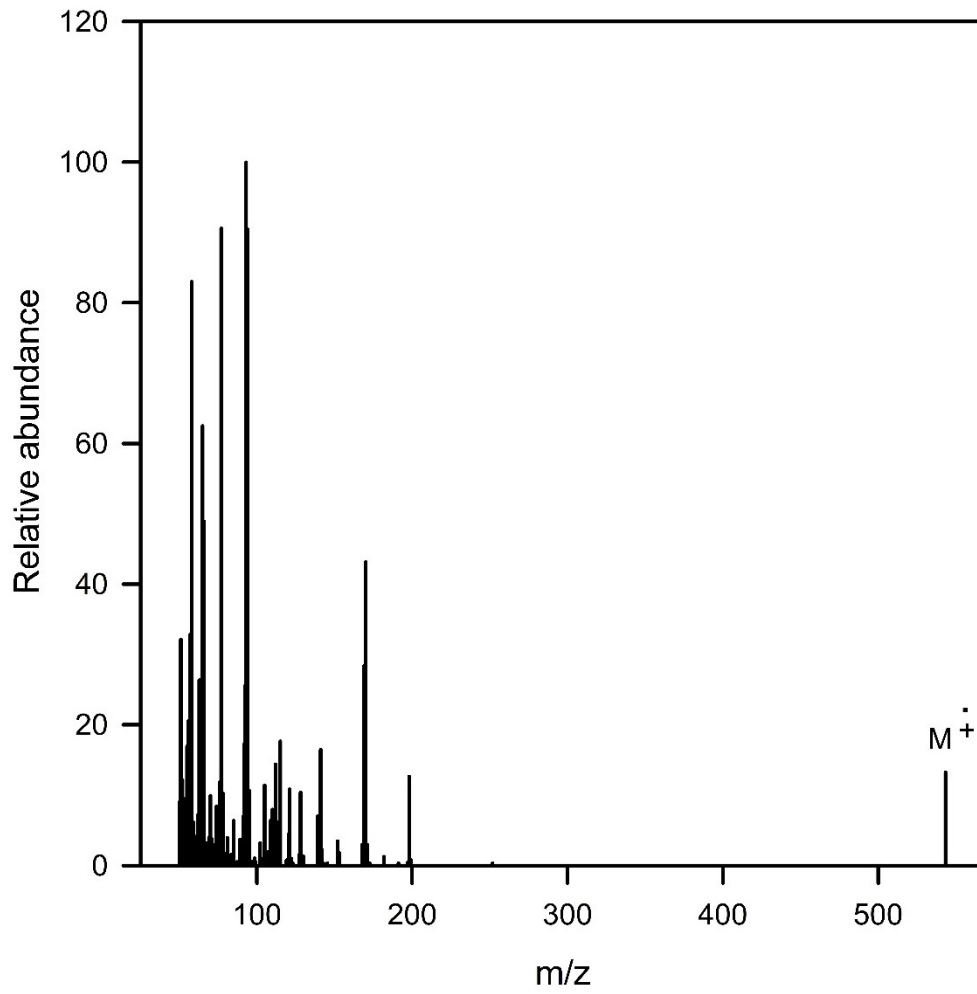

**Figure S2** Mass spectrum of the prepared AD.

**Table S1.** Raw data of the IPD model.

| Stage     | $t^{1/2}$ (min <sup>1/2</sup> ) | $q_e$ (mg/g) |
|-----------|---------------------------------|--------------|
| Stage I   | 3.16                            | 6.32         |
|           | 4.47                            | 6.63         |
|           | 5.48                            | 6.90         |
| Stage II  | 5.48                            | 6.90         |
|           | 7.75                            | 7.01         |
|           | 9.49                            | 7.20         |
|           | 10.95                           | 7.43         |
| Stage III | 10.95                           | 7.43         |
|           | 12.25                           | 7.30         |
|           | 13.42                           | 7.29         |
|           | 14.49                           | 7.15         |
|           | 15.49                           | 6.91         |
